# Supplementary material for: Rewiring the dynamic interactome
Source: Royal Society of Chemistry journal article supplement (doi:10.1039/c2mb25050k), 2012-06-01
Supplement: c2mb25050k_2.pdf [file c2mb25050k_2.pdf]

## Supplementary Tables

### Supplementary Table 1 Homology search for isoforms without Pfam domain prediction

Sequence similarity search was done against mouse proteins for isoforms without Pfam annotation from single-isoform units and multiple-isoform clusters. Values from the second to the last column are the average of the best hit match scores. The differences in length and identity are statistically significant ( $p \ll 0.0001$ , and  $p = 0$ , respectively). For sequence similarity analysis, Sserach was used.

| <b>Ssearch</b> | <b>Total protein</b> | <b>Avg of length(aa)</b> | <b>Avg of E-value</b> | <b>Avg of identity (%)</b> |
|----------------|----------------------|--------------------------|-----------------------|----------------------------|
| si-TUX         | 9105                 | 124                      | 2.17                  | 38                         |
| mi-TUX         | 2247                 | 498                      | 0.41                  | 68                         |

## Supplementary Table 2 Collection of PPIs

| Integrated PPIs <sup>a</sup> |               | High-confident PPIs <sup>b</sup> |               | PPIs mapped to Clusters <sup>c</sup> |                              | PPIs with DDI <sup>d</sup> |                               |
|------------------------------|---------------|----------------------------------|---------------|--------------------------------------|------------------------------|----------------------------|-------------------------------|
| # of PPIs                    | # of proteins | # of PPIs                        | # of proteins | # of PPIs mapped                     | # of proteins in mapped PPIs | # PPIs with DDI            | # of proteins in PPI with DDI |
| 43104                        | 10484         | 29761                            | 8872          | 28309                                | 8522                         | 7805                       | 4202                          |

<sup>a</sup> Integrated PPIs: PPIs which were not singly detected by Y2H methods

<sup>b</sup> High-confident PPIs: PPIs generated by the low-throughput screen or supported by more than one literature

<sup>c</sup> PPIs mapped to Clusters: PPIs in which both interacting proteins are present in any cluster as an isoform

<sup>d</sup> PPIs with DDI: PPIs in which at least one combination of interacting domains from each interacting proteins is present a known DDI

### Supplementary Table 3 A review of the literature identifies 22 genes with variation that effects binding

| Gene symbol     | PubMed                           | Splicing mechanism                                                                                                                              | Consequence                  |
|-----------------|----------------------------------|-------------------------------------------------------------------------------------------------------------------------------------------------|------------------------------|
| ADAM15          | 15263807                         | <ul style="list-style-type: none"> <li>Alternative splicing</li> </ul>                                                                          | Binding differentiation      |
| MACF1           | 21041478                         | <ul style="list-style-type: none"> <li>Alternative splicing</li> <li>Tissue-specific internal promoters</li> </ul>                              | Binding differentiation      |
| NRXN3           | 7736595                          | <ul style="list-style-type: none"> <li>Alternative promoter</li> <li>Alternative splicing</li> </ul>                                            | Binding differentiation      |
| <b>PPP1R8</b>   | 10103062<br>10564811             | <ul style="list-style-type: none"> <li>Alternative promoter</li> </ul>                                                                          | Binding differentiation      |
| <b>KDR</b>      | 20961309                         | <ul style="list-style-type: none"> <li>Alternative splicing</li> </ul>                                                                          | Binding differentiation      |
| <b>TNFRSF1B</b> | 14688072                         | <ul style="list-style-type: none"> <li>Alternative splicing</li> </ul>                                                                          | Binding differentiation      |
| TRAF2           | 9461607                          | <ul style="list-style-type: none"> <li>Alternative splicing</li> </ul>                                                                          | Binding differentiation      |
| VEGFA           | 21041478<br>11427521<br>15520188 | <ul style="list-style-type: none"> <li>Alternative promoter usage</li> <li>Alternative splicing</li> </ul>                                      | Binding differentiation      |
| USH2A           | 14676276                         | <ul style="list-style-type: none"> <li>Alternative splicing</li> </ul>                                                                          | Binding differentiation      |
| <b>UMOD</b>     | 14531790                         | <ul style="list-style-type: none"> <li>Alternative splicing</li> </ul>                                                                          | Binding differentiation      |
| NUMB            | 21041478                         | <ul style="list-style-type: none"> <li>Alternative splicing</li> </ul>                                                                          | Impact on PPI not identified |
| APP             | 21041478                         | <ul style="list-style-type: none"> <li>Alternative splicing</li> </ul>                                                                          | Impact on PPI not identified |
| JAK2            | 20730051                         | <ul style="list-style-type: none"> <li>Alternative splicing</li> </ul>                                                                          | Impact on PPI not identified |
| <b>YTHDC1</b>   | 20686370                         | <ul style="list-style-type: none"> <li>Alternative splicing</li> </ul>                                                                          | Impact on PPI not identified |
| <b>PLEC</b>     | 14672974                         | <ul style="list-style-type: none"> <li>Alternative promoter</li> </ul>                                                                          | Impact on PPI not identified |
| <b>CACNA1B</b>  | 20852623                         | <ul style="list-style-type: none"> <li>Alternative splicing</li> </ul>                                                                          | Impact on PPI not identified |
| BRCA-1          | 8972225                          | <ul style="list-style-type: none"> <li>Alternative promoter</li> <li>Alternative splicing</li> </ul>                                            | location differentiation     |
| CSF-1           | 3500041                          | <ul style="list-style-type: none"> <li>Alternative splicing</li> </ul>                                                                          | location differentiation     |
| <b>RBM9</b>     | 20042473                         | <ul style="list-style-type: none"> <li>Auto-regulation</li> </ul>                                                                               | RNA binding differentiation  |
| <b>TPM1</b>     | 3336363                          | <ul style="list-style-type: none"> <li>Alternative splicing</li> </ul>                                                                          | Tissue differentiation       |
| <b>PTPN22</b>   | 21044313                         | <ul style="list-style-type: none"> <li>Alternative splicing</li> </ul>                                                                          | Tissue differentiation       |
| MID1            | 18005432                         | <ul style="list-style-type: none"> <li>Tissue-specific usage of the alternative polyadenylation sites</li> <li>Alternative promoters</li> </ul> | Tissue differentiation       |

### Supplementary Table 4 Proteins mapped to clusters

Interacting proteins were mapped to isoform clusters based on the exact sequence match and Entrez Gene ID.

| <b>Protein set</b>                                      | <b># of proteins</b> |
|---------------------------------------------------------|----------------------|
| Proteins mapped to cluster based on sequence similarity | 5827                 |
| Proteins mapped to cluster based on GeneID              | 2757                 |
| Unmapped proteins                                       | 288                  |
| Total                                                   | 8872                 |

### Supplementary Table 5 Transcript datasets

Transcript units from two transcriptome datasets (H-InvitationalDB and FANTOM3) were used in this study. The second column addresses the total number of transcriptional units for each dataset, and the third and fourth columns address the number of transcriptional units according to the orientation on the human genome for forward and reverse direction respectively.

|                             | <b>Transcript cluster</b> | <b>FORWARD set</b> | <b>REVERSE set</b> |
|-----------------------------|---------------------------|--------------------|--------------------|
| <b># of HIX<sup>a</sup></b> | 18513                     | 9329               | 9184               |
| <b># of TU<sup>b</sup></b>  | 21480                     | 10790              | 10690              |
| <b>Total</b>                | 39993                     | 20119              | 19874              |

<sup>a</sup>H-Invitational cluster (HIX) in H-Invitational DB (H-Inv)

<sup>b</sup>Transcriptional unit (TU) in FANTOM3
